# Supplementary material for: Quantifying and understanding the triboelectric series of inorganic non-metallic materials
Source: PubMed Central journal article supplement (PMC7190865; doi:10.1038/s41467-020-15926-1), 2020-04-29
Supplement: 41467_2020_15926_MOESM1_ESM.pdf [file 41467_2020_15926_MOESM1_ESM.pdf]

Supplementary Information for  
**Quantifying and understanding the triboelectric series of  
inorganic non-metallic materials**

by Haiyang et al.

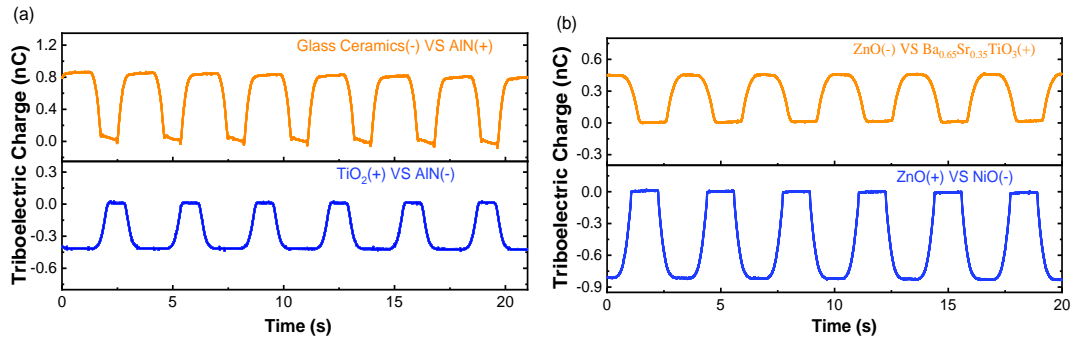

**Supplementary Figure 1. The cross-check results charge transfer between various inorganic materials.**

(a) cross-check AlN with Glass ceramics and TiO<sub>2</sub>, and (b) cross-check ZnO with Ba<sub>0.65</sub>Sr<sub>0.35</sub>TiO<sub>3</sub> and NiO.

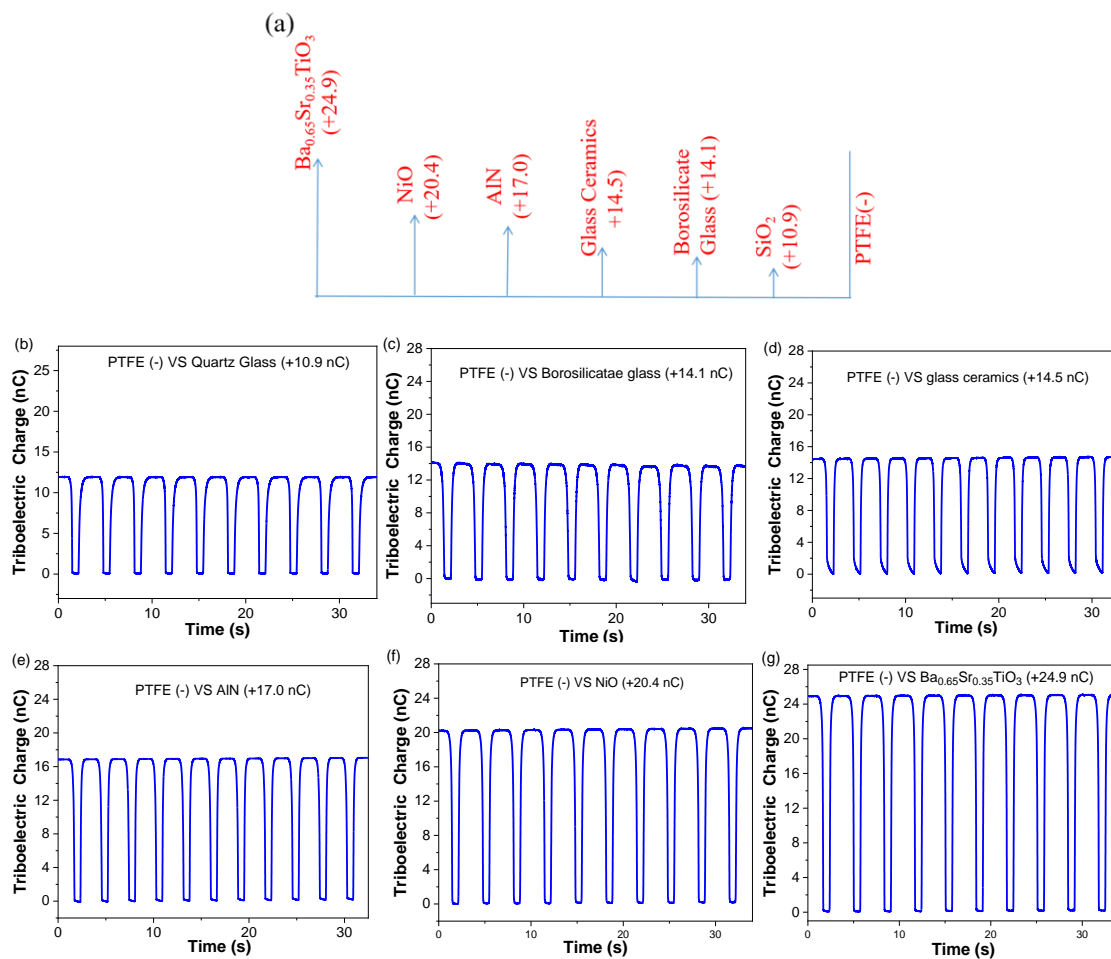

**Supplementary Figure 2. The charge transfer between PTFE and various inorganic materials.** (a) The ranking for the tested materials in the triboelectric series. (b-g) The measured charge transfer between PTFE and Quartz Glass (b), Borosilicate glass (c), High-Temperature Glass Ceramic (d), AlN (e), NiO (f), and  $\text{Ba}_{0.65}\text{Sr}_{0.35}\text{TiO}_3$  (g).

a.

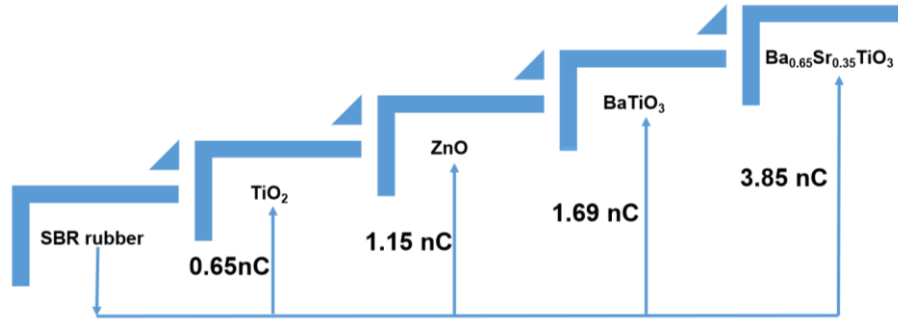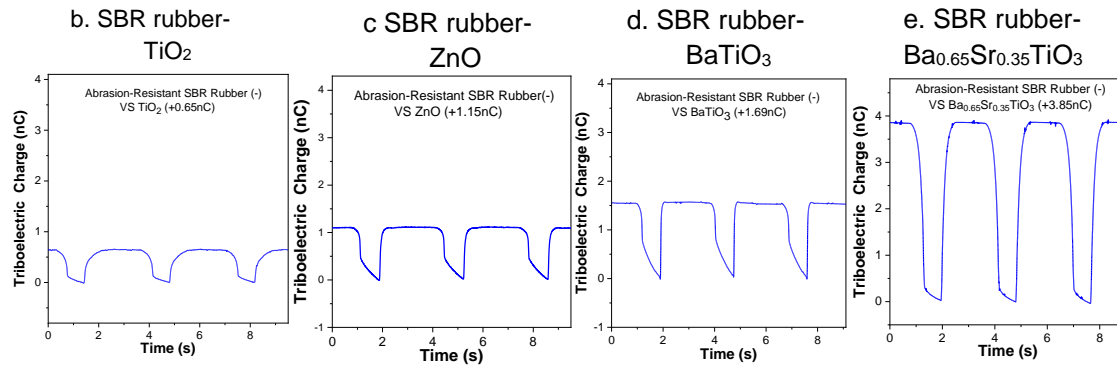

**Supplementary Figure 3. The charge transfer between SBR rubber and various inorganic materials. (a)** The ranking for the tested materials in the triboelectric series. (b-e) The measured charge transfer between SBR rubber and  $\text{TiO}_2$  (b), ZnO (c),  $\text{BaTiO}_3$  (d), and  $\text{Ba}_{0.65}\text{Sr}_{0.35}\text{TiO}_3$  (e).

**Supplementary Table 1. The details of tested materials.** Note: mil is equal to one thousandth of an inch.

| Materials                                              | Vendor                                               | Catalog No. | Synthesis Process                                                                                                                                                  | Thickness (mil) | Raw materials                                                                     |
|--------------------------------------------------------|------------------------------------------------------|-------------|--------------------------------------------------------------------------------------------------------------------------------------------------------------------|-----------------|-----------------------------------------------------------------------------------|
| Mica                                                   | Macmaster                                            | 8802K16     |                                                                                                                                                                    |                 |                                                                                   |
| Float glass                                            | Beijing Kaifa Advanced Ceramics Technology Co., Ltd. |             |                                                                                                                                                                    | 78.7            |                                                                                   |
| Borosilicate glass                                     | Macmaster                                            | 8476K12     |                                                                                                                                                                    | 125             |                                                                                   |
| BeO                                                    | Guangzhou Beilong Electronics Co., Ltd.              |             |                                                                                                                                                                    | 27.6            |                                                                                   |
| PZT-5                                                  | Zhejiang Gengjian Electronic Technology Co., Ltd.    |             |                                                                                                                                                                    | 78.7            |                                                                                   |
| MgSiO <sub>3</sub>                                     | Synthesized                                          |             | 1、atmosphere: air 2、<br>calcining temperature: 1100°C<br>3、calcining time: 3h<br>4、sintering temperature:<br>1400°C 5、heating rate:3°C/min<br>6、sintering time: 2h | 63.3            | MgO, SiO <sub>2</sub>                                                             |
| CaSiO <sub>3</sub>                                     | Synthesized                                          |             | 1、atmosphere: air 2、<br>calcining temperature: 1100°C<br>3、calcining time: 3h<br>4、sintering temperature:<br>1400°C 5、heating rate:3°C/min<br>6、sintering time: 2h | 63.5            | CaCO <sub>3</sub> , SiO <sub>2</sub>                                              |
| Bi <sub>4</sub> Ti <sub>3</sub> O <sub>12</sub>        | Synthesized                                          |             | 1、atmosphere: air 2、<br>calcining temperature: 800°C<br>3、calcining time: 2h<br>4、sintering temperature:<br>1200°C 5、heating rate:3°C/min<br>6、sintering time: 2h  | 61.9            | Bi <sub>2</sub> O <sub>3</sub> ,TiO <sub>2</sub>                                  |
| Bi <sub>0.5</sub> Na <sub>0.5</sub> TiO <sub>3</sub>   | Synthesized                                          |             | 1、atmosphere: air 2、<br>calcining temperature: 800°C<br>3、calcining time: 2h<br>4、sintering temperature:<br>1160°C 5、heating rate:3°C/min<br>6、sintering time: 2h  | 62.4            | Bi <sub>2</sub> O <sub>3</sub> ,Na <sub>2</sub> CO <sub>3</sub> ,TiO <sub>2</sub> |
| NiFe <sub>2</sub> O <sub>4</sub>                       | Synthesized                                          |             | 1、atmosphere: air 2、<br>calcining temperature: 1100°C<br>3、calcining time: 6h<br>4、sintering temperature:<br>1200°C 5、heating rate:3°C/min<br>6、sintering time: 6h | 61.2            | NiO,Fe <sub>2</sub> O <sub>3</sub>                                                |
| Ba <sub>0.65</sub> Sr <sub>0.35</sub> TiO <sub>3</sub> | Synthesized                                          |             | 1、atmosphere: air 2、<br>calcining temperature: 1100°C<br>3、calcining time: 3h<br>4、sintering temperature:<br>1400°C 5、heating rate:5°C/min<br>6、sintering time: 3h | 59.1            | BaCO <sub>3</sub> ,<br>SrCO <sub>3</sub> ,TiO <sub>2</sub>                        |

(To be continued)

(Continued)

| Materials                      | Vendor                                                 | Catalog No. | Synthesis Process                                                                                                                                                      | Thickness (mil) | Raw materials                       |
|--------------------------------|--------------------------------------------------------|-------------|------------------------------------------------------------------------------------------------------------------------------------------------------------------------|-----------------|-------------------------------------|
| BaTiO <sub>3</sub>             | Synthesized                                            |             | 1、atmosphere: air 2、<br>calcining temperature: 1100°C 3、<br>calcining time: 3h 4、<br>sintering temperature: 1350°C 5、<br>heating rate:5°C/min 6、<br>sintering time: 3h | 59.1            | BaCO <sub>3</sub> ,TiO <sub>2</sub> |
| PZT-4                          | Zhejiang Gengjian Electronic Technology Co., Ltd.      |             |                                                                                                                                                                        | 100.4           |                                     |
| ZnO                            | Synthesized                                            |             | 1、atmosphere: air 2、<br>sintering temperature: 1200°C 3、<br>heating rate:5°C/min 4、 sintering<br>time: 1.5h                                                            | 60.3            | ZnO                                 |
| NiO                            | Synthesized                                            |             | 1、atmosphere: air 2、<br>sintering temperature: 1420°C 3、<br>heating rate:5°C/min 4、 sintering<br>time: 3h                                                              | 59.1            | NiO                                 |
| SnO <sub>2</sub>               | Synthesized                                            |             | 1、atmosphere: air 2、<br>sintering temperature: 1300°C 3、<br>heating rate:5°C/min 4、 sintering<br>time: 2h                                                              | 59.3            | SnO <sub>2</sub>                    |
| SiC                            | Guangzhou Beilong Electronics Co., Ltd.                |             |                                                                                                                                                                        | 78.7            |                                     |
| CaTiO <sub>3</sub>             | Synthesized                                            |             | 1、atmosphere: air 2、<br>calcining temperature: 1100°C 3、<br>calcining time: 3h 4、<br>sintering temperature: 1350°C 5、<br>heating rate:5°C/min 6、<br>sintering time: 3h | 61.2            | CaCO <sub>3</sub> TiO <sub>2</sub>  |
| ZrO <sub>2</sub>               | Guangzhou Beilong Electronics Co., Ltd.                |             |                                                                                                                                                                        | 39.4            |                                     |
| Cr <sub>2</sub> O <sub>3</sub> | Synthesized                                            |             | 1、atmosphere: air 2、<br>sintering temperature: 1500°C 3、<br>heating rate:5°C/min 4、 sintering<br>time: 3h                                                              | 60.2            | Cr <sub>2</sub> O <sub>3</sub>      |
| Fe <sub>2</sub> O <sub>3</sub> | Synthesized                                            |             | 1、atmosphere: air 2、<br>sintering temperature: 800°C 3、<br>heating rate:5°C/min 4、 sintering<br>time: 3h                                                               | 59.6            | Fe <sub>2</sub> O <sub>3</sub>      |
| Al <sub>2</sub> O <sub>3</sub> | Fujian Huaqing Electronic Material Technology Co.,Ltd. |             | 1、atmosphere: air 2、<br>sintering temperature: 1600°C 3、<br>heating rate:5°C/min 4、 sintering<br>time: 3h                                                              | 39.4            |                                     |
| TiO <sub>2</sub>               | Synthesized                                            |             | 1、atmosphere: air 2、<br>sintering temperature: 1350°C 3、<br>heating rate:5°C/min 4、 sintering<br>time: 3h                                                              | 60.3            | TiO <sub>2</sub>                    |

(To be continued)

(Continued)

| Materials                                 | Vendor                                                 | Catalog No. | Synthesis Process                                                                                                                       | Thickness (mil) | Raw materials |
|-------------------------------------------|--------------------------------------------------------|-------------|-----------------------------------------------------------------------------------------------------------------------------------------|-----------------|---------------|
| AlN                                       | Fujian Huaqing Electronic Material Technology Co.,Ltd. |             | 1、atmosphere: N <sub>2</sub> +H <sub>2</sub> (5%)<br>2、sintering temperature: 1800°C<br>3、heating rate:5°C/min 4、<br>sintering time: 3h | 39.4            |               |
| BN                                        | Guangzhou Beilong Electronics Co., Ltd.                |             |                                                                                                                                         | 78.7            |               |
| Clear Very High-Temperature Glass Ceramic | Macmaster                                              | 84815K41    |                                                                                                                                         | 197             |               |
| Ultra-High-Temperature Quartz Glass       | Macmaster                                              | 1357T47     |                                                                                                                                         | 62.5            |               |

**Supplementary Table 2. The work functions and dielectric constants of tested materials**

| Materials                                              | Work function (eV)      | Dielectric constant    |
|--------------------------------------------------------|-------------------------|------------------------|
| Float glass                                            |                         | 4.7 <sup>1</sup>       |
| Borosilicate glass                                     |                         | 4.5 - 6.2 <sup>1</sup> |
| BeO                                                    | 3.95-4.7 <sup>2</sup>   | 7.15-7.55 <sup>1</sup> |
| PZT-5                                                  | 4.5 <sup>3</sup>        | 1600-3400 <sup>1</sup> |
| MgSiO <sub>3</sub>                                     |                         | 6.5 <sup>1</sup>       |
| CaSiO <sub>3</sub>                                     | 4.35-4.48 <sup>4</sup>  | 5-5.65 <sup>1</sup>    |
| Bi <sub>4</sub> Ti <sub>3</sub> O <sub>12</sub>        |                         | 112 <sup>1</sup>       |
| Bi <sub>0.5</sub> Na <sub>0.5</sub> TiO <sub>3</sub>   |                         | 400 <sup>1</sup>       |
| NiFe <sub>2</sub> O <sub>4</sub>                       |                         | 17 <sup>5</sup>        |
| Ba <sub>0.65</sub> Sr <sub>0.35</sub> TiO <sub>3</sub> | 4.5 <sup>3</sup>        | 3688 <sup>1</sup>      |
| BaTiO <sub>3</sub>                                     | 4.0-4.8 <sup>6</sup>    | 2300 <sup>1</sup>      |
| PZT-4                                                  | 3.9-4.6 <sup>7</sup>    | 1550 <sup>1</sup>      |
| ZnO                                                    | 4.1-5.3 <sup>8</sup>    | 8.2-11 <sup>1</sup>    |
| NiO                                                    | 4.4- 5.2 <sup>9</sup>   | 11.9 <sup>1</sup>      |
| SnO <sub>2</sub>                                       | 4.7 <sup>10</sup>       | 8.5-16 <sup>1</sup>    |
| SiC                                                    | 4.41-4.85 <sup>11</sup> | 9.7-10.03 <sup>1</sup> |
| CaTiO <sub>3</sub>                                     | 5.30-5.35 <sup>12</sup> | 165 <sup>1</sup>       |

(To be continued)



(Continued)

| Materials                                 | Work function (eV)                     | Dielectric constant     |
|-------------------------------------------|----------------------------------------|-------------------------|
| ZrO <sub>2</sub>                          | 5.14 <sup>13</sup> -5.55 <sup>14</sup> | 12.5 <sup>1</sup>       |
| Cr <sub>2</sub> O <sub>3</sub>            | 4.0 <sup>15</sup> -4.8 <sup>16</sup>   | 11.9-13.3 <sup>1</sup>  |
| Fe <sub>2</sub> O <sub>3</sub>            | 4.5-5.6 <sup>17</sup>                  | 12 <sup>1</sup>         |
| Al <sub>2</sub> O <sub>3</sub>            | 4.7-6 <sup>18</sup>                    | 9 <sup>1</sup>          |
| TiO <sub>2</sub>                          | 4.9-5.4 <sup>19</sup>                  | 86-170 <sup>1</sup>     |
| AlN                                       | 5.35 <sup>11</sup>                     | 8.7-9 <sup>1</sup>      |
| BN                                        | B tip 5.843,N tip 7.203 <sup>20</sup>  | 7.1 <sup>1</sup>        |
| Clear Very High-Temperature Glass Ceramic | —                                      | —                       |
| Ultra-High-Temperature Quartz Glass       | 5.476-5.508 <sup>4</sup>               | 4.41-4.6 <sup>1,4</sup> |
| CaTiO <sub>3</sub>                        | 0.24                                   | 5.30-5.35 <sup>12</sup> |

## Supplementary References

- 1 Haynes, W. M. Crc handbook of chemistry and physics : A ready-reference book of chemical and physical data 93rd edn12-124 (CRC Press, Boca Raton, 2012-2013).
- 2 Ahmadaghaei, N. & Noei, M. Density functional study on the sensing properties of nano-sized beo tube toward h<sub>2</sub>s. *J. Iran. Chem. Soc.* **11**, 725-731 (2014).
- 3 Quan, Z. *et al.* Interfacial characteristics and dielectric properties of ba<sub>0.65</sub>sr<sub>0.35</sub>tio<sub>3</sub> thin films. *Thin Solid Films* **516**, 999-1005 (2008).
- 4 Manouchehri, H. R., Hanumantha Rao, K. & Forssberg, K. S. E. Triboelectric charge, electrophysical properties and electrical beneficiation potential of chemically treated feldspar, quartz and wollastonite. *Magn. Electr. Separ.* **11**, 9-32 (2002).
- 5 Lv, L. *et al.* Grain size effect on the dielectric and magnetic properties of nife<sub>2</sub>o<sub>4</sub> ceramics. *Physica E Low Dimens. Syst. Nanostruct.* **43**, 1798-1803 (2011).
- 6 Schulmeyer, T. *et al.* Modification of batio<sub>3</sub> thin films: Adjustment of the effective surface work function. *J. Mater. Chem.* **17**, 4563-4570 (2007).
- 7 Wang, C. Y. *et al.* Photocathodic behavior of ferroelectric pb(zr,tio)-3 films decorated with silver nanoparticles. *Chem. Commun.* **49**, 3769-3771 (2013).
- 8 Gutmann, S., Conrad, M., Wolak, M. A., Beerbom, M. M. & Schlaf, R. Work function measurements on nano-crystalline zinc oxide surfaces. *J. Appl. Phys.* **111**, 123710 (2012).
- 9 Hietzschold, S. *et al.* Functionalized nickel oxide hole contact layers: Work function versus conductivity. *ACS Appl. Mater. Interfaces* **9**, 39821-39829 (2017).
- 10 Yu, S. H. *et al.* Optimization of sno<sub>2</sub>/ag/sno<sub>2</sub> tri-layer films as transparent composite electrode with high figure of merit. *Thin Solid Films* **552**, 150-154 (2014).
- 11 Pelletier, J., Gervais, D. & Pomot, C. Application of wide-gap semiconductors to surface-ionization - work-functions of aln and sic single-crystals. *J. Appl. Phys.* **55**, 994-1002 (1984).
- 12 Lin, J. J. *et al.* In situ hydrothermal etching fabrication of catio<sub>3</sub> on tio<sub>2</sub> nanosheets with heterojunction effects to enhance co<sub>2</sub> adsorption and photocatalytic reduction. *Catal. Sci. Technol.* **9**, 336-346 (2019).
- 13 Tsiplakides, D. & Vayenas, C. G. The absolute potential scale in solid state electrochemistry. *Solid State Ionics* **152**, 625-639 (2002).
- 14 Miyazaki, S., Narasaki, M., Ogasawara, M. & Hirose, M. Chemical and electronic structure of ultrathin zirconium oxide films on silicon as determined by photoelectron spectroscopy. *Solid State Electron.* **46**, 1679-1685 (2002).
- 15 Mejias, J. A., Staemmler, V. & Freund, H. J. Electronic states of the cr<sub>2</sub>o<sub>3</sub>(0001) surface from ab initio embedded cluster calculations. *J. Condens. Matter Phys.* **11**, 7881-7891 (1999).
- 16 Balouria, V. *et al.* Temperature dependent h<sub>2</sub>s and cl<sub>2</sub> sensing selectivity of cr<sub>2</sub>o<sub>3</sub> thin films. *Sens. Actuators, B Chem.* **157**, 466-472 (2011).
- 17 Chueh, Y. L., Lai, M. W., Liang, J. Q., Chou, L. J. & Wang, Z. L. Systematic study of the growth of aligned arrays of alpha-fe<sub>2</sub>o<sub>3</sub> and fe<sub>3</sub>o<sub>4</sub> nanowires by a vapor-solid process. *Adv. Funct. Mater.* **16**, 2243-2251 (2006).
- 18 Wang, Y., Li, Y. W., Yu, K. & Zhu, Z. Q. Controllable synthesis and field emission enhancement of al<sub>2</sub>o<sub>3</sub> coated in<sub>2</sub>o<sub>3</sub> core-shell nanostructures. *J. Phys. D Appl. Phys.* **44**, 105301 (2011).
- 19 Imanishi, A., Tsuji, E. & Nakato, Y. Dependence of the work function of tio<sub>2</sub> (rutile) on crystal faces, studied by a scanning auger microprobe. *J. Phys. Chem. C* **111**, 2128-2132 (2007).
- 20 He, C. Y., Yu, Z. Z., Sun, L. Z. & Zhong, J. X. Work functions of boron nitride nanoribbons: First-principles study. *J. Comput. Theor. Nanosci.* **9**, 16-22 (2012).
